# Supplementary material for: Tin-palladium supported on alumina as a highly active and selective catalyst for hydrogenation of nitrate in actual groundwater polluted with nitrate
Source: Royal Society of Chemistry journal article supplement (doi:10.1039/c8cy00730f), 2018-01-01
Supplement: c8cy00730f1.pdf [file c8cy00730f1.pdf]

## Electronic Supplementary Information

### **Tin-palladium supported on alumina as a highly active and selective catalyst for hydrogenation of nitrate in actual groundwater polluted with nitrate**

Jun Hirayama<sup>a,b</sup> and Yuichi Kamiya<sup>b\*</sup>

<sup>a</sup> Research Fellow of Japan Society for the Promotion of Science (JSPS), 5-3-1 Chiyoda-ku, Tokyo 102-0083, Japan

<sup>b</sup> Faculty of Environmental Earth Science, Hokkaido University, Nishi 5, Kita 10, Kita-ku, Sapporo 060-0810, Japan

\*Corresponding author

Yuichi Kamiya, E-mail: [kamiya@ees.hokudai.ac.jp](mailto:kamiya@ees.hokudai.ac.jp)

Table S1 Catalytic performance of Sn<sub>0.5</sub>Pd/Al<sub>2</sub>O<sub>3</sub> with different metal loadings for the hydrogenation of NO<sub>3</sub><sup>-</sup>.

| Loading amount of Sn <sub>0.5</sub> Pd<br>/wt% | NO <sub>3</sub> <sup>-</sup> -decomposition rate/<br>mmol h <sup>-1</sup> g <sup>-1</sup> | Selectivity <sup>a</sup> /%  |     |
|------------------------------------------------|-------------------------------------------------------------------------------------------|------------------------------|-----|
|                                                |                                                                                           | NH <sub>4</sub> <sup>+</sup> | Gas |
| 6.5                                            | 8.0                                                                                       | 1                            | 99  |
| 1.0                                            | 1.4                                                                                       | 1                            | 99  |

Reaction conditions: catalyst weight, 10 mg; reactant NO<sub>3</sub><sup>-</sup> (from KNO<sub>3</sub>), 0.8 mmol dm<sup>-3</sup>, volume of reaction solution 250 cm<sup>3</sup>; gas composition, H<sub>2</sub>/CO<sub>2</sub> = 1/1; gas flow rate, 30 cm<sup>3</sup> min<sup>-1</sup>; and reaction temperature, 298 K.

<sup>a</sup> Selectivity at around 30% conversion.
